# Supplementary material for: Associated deaths and disability-adjusted life-years caused by infections with antibiotic-resistant bacteria in Switzerland, 2010 to 2019
Source: PubMed Central journal article supplement (PMC10197493; doi:10.2807/1560-7917.es.2023.28.20.2200532), 2023-05-18
Supplement: 22-00532_GASSER_Supplement.pdf [file 22-00532_GASSER_Supplement.pdf]

# Supplementary material for the Eurosurveillance research article "Associated deaths and disability-adjusted life-years caused by infections with antibiotic-resistant bacteria in Switzerland 2010-2019"

## Disclaimer

This supplementary material is hosted by Eurosurveillance as supporting information alongside the article "Associated deaths and disability-adjusted life-years caused by infections with antibiotic-resistant bacteria in Switzerland 2010-2019", on behalf of the authors, who remain responsible for the accuracy and appropriateness of the content. The same standards for ethics, copyright, attributions and permissions as for the article apply. Supplements are not edited by Eurosurveillance and the journal is not responsible for the maintenance of any links or email addresses provided therein.

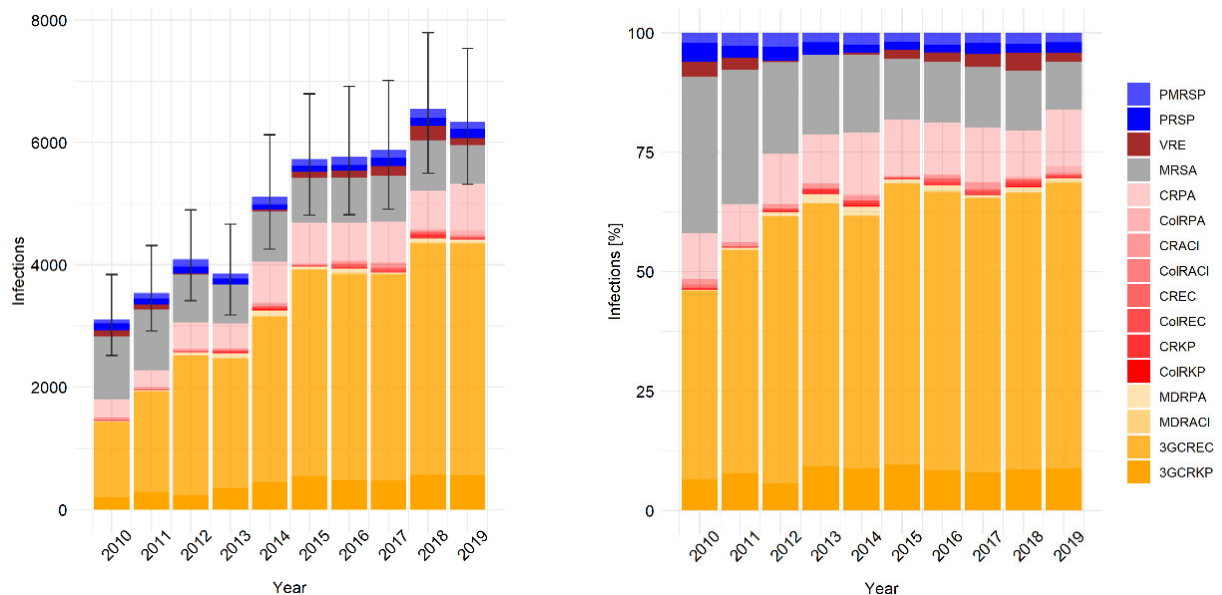

**Figure S1:** Infections with antibiotic-resistant bacteria in Switzerland from 2010 to 2019. Absolute values are shown on the left panel, relative contributions (%) of individual antibiotic resistant bacteria on the right panel. Data which were stratified according to the linguistic region and the hospital type were aggregated for these estimations. The 95% uncertainty intervals of the yearly totals are shown as black bars. ColRACI=colistin-resistant *Acinetobacter* spp. CRACI=carbapenem-resistant *Acinetobacter* spp. MDRACI=multidrug-resistant *Acinetobacter* spp. VRE=vancomycin-resistant *Enterococcus faecalis* and *Enterococcus faecium*. ColREC=colistin-resistant *Escherichia coli*. CREC=carbapenem-resistant *E. coli*. 3GCRC=third-generation cephalosporin-resistant *E. coli*. ColRKP=colistin-resistant *Klebsiella pneumoniae*. CRKP=carbapenem-resistant *K. pneumoniae*. 3GCRKP=third-generation cephalosporin-resistant *K. pneumoniae*. ColRPA=colistin-resistant *Pseudomonas aeruginosa*. CRPA=carbapenem-resistant *P. aeruginosa*. MDRPA=multidrug-resistant *P. aeruginosa*. MRSA=meticillin-resistant *Staphylococcus aureus*. PRSP=penicillin-resistant *Streptococcus pneumoniae*. PMRSP=penicillin-resistant and macrolide-resistant *S. pneumoniae*.

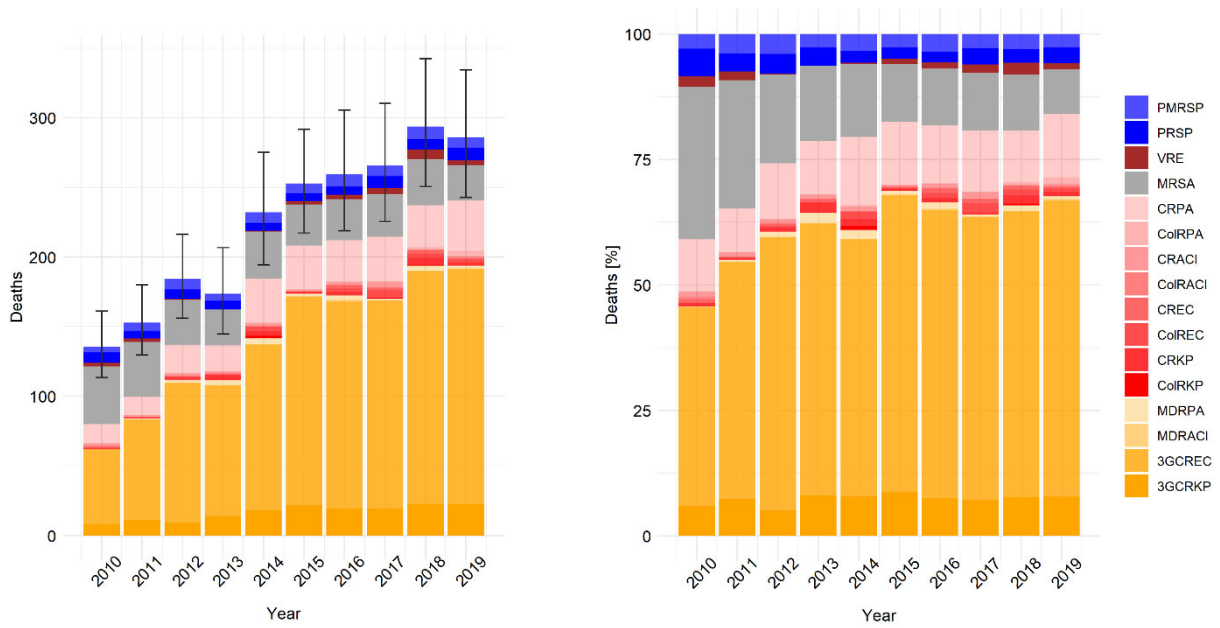

**Figure S2:** Deaths caused by infections with antibiotic-resistant bacteria in Switzerland from 2010 to 2019. Absolute values are shown on the left panel, relative contributions (%) of individual antibiotic resistant bacteria on the right panel. Data which were stratified according to the linguistic region and the hospital type were aggregated for these estimations. The 95% uncertainty intervals of the yearly totals are shown as black bars.

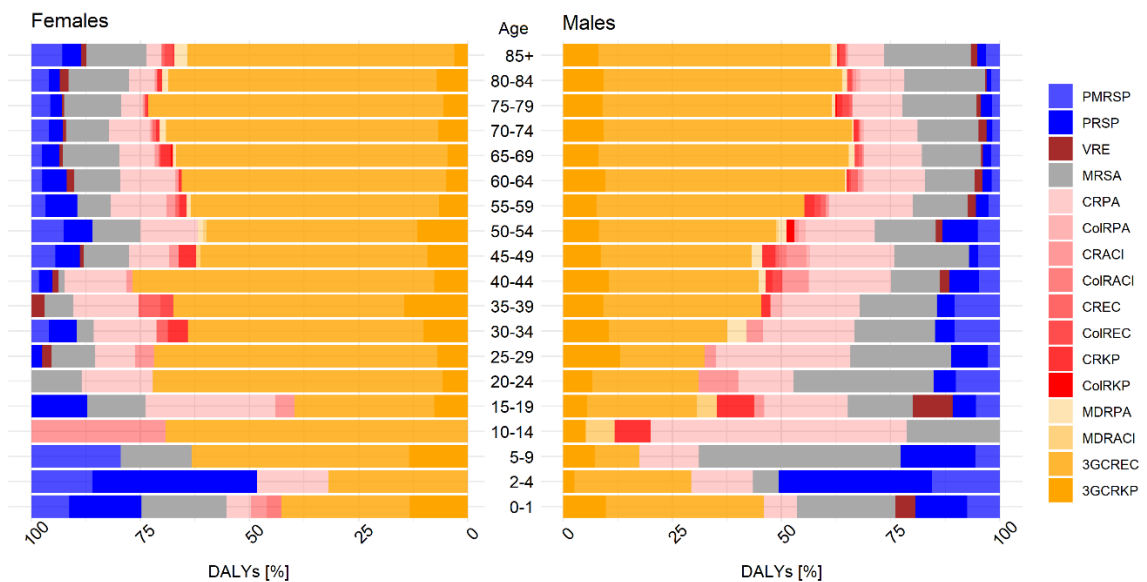

**Figure S3:** Proportions of DALYs in Switzerland (2010-2019) stratified the sex and age.

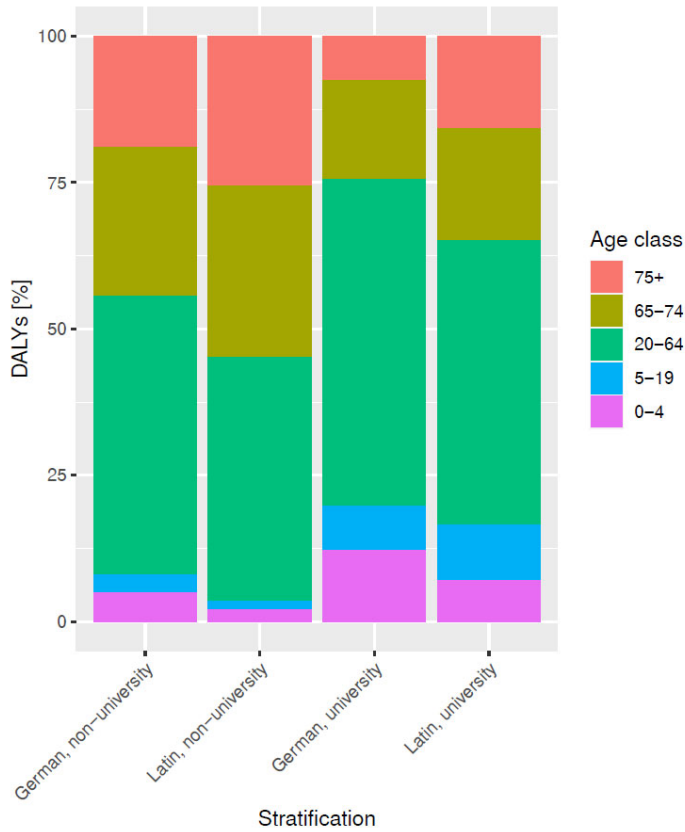

**Figure S4:** Age-specific DALYs distributions stratified by linguistic region and hospital type, Switzerland, 2010-2019.

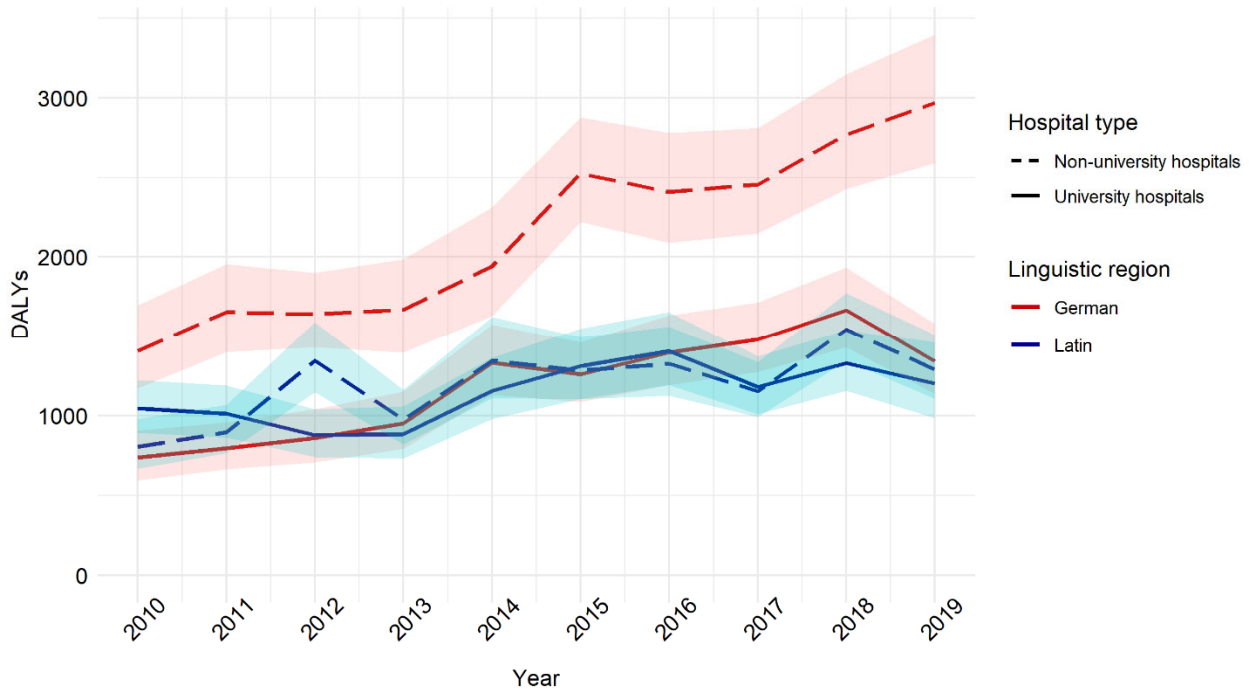

**Figure S5:** Model estimates of the burden of infections with antibiotic-resistant bacteria of public health importance in DALYs by linguistic region and hospital type, Switzerland, 2010-2019. The 95% uncertainty intervals are depicted by semi-transparent ribbons.

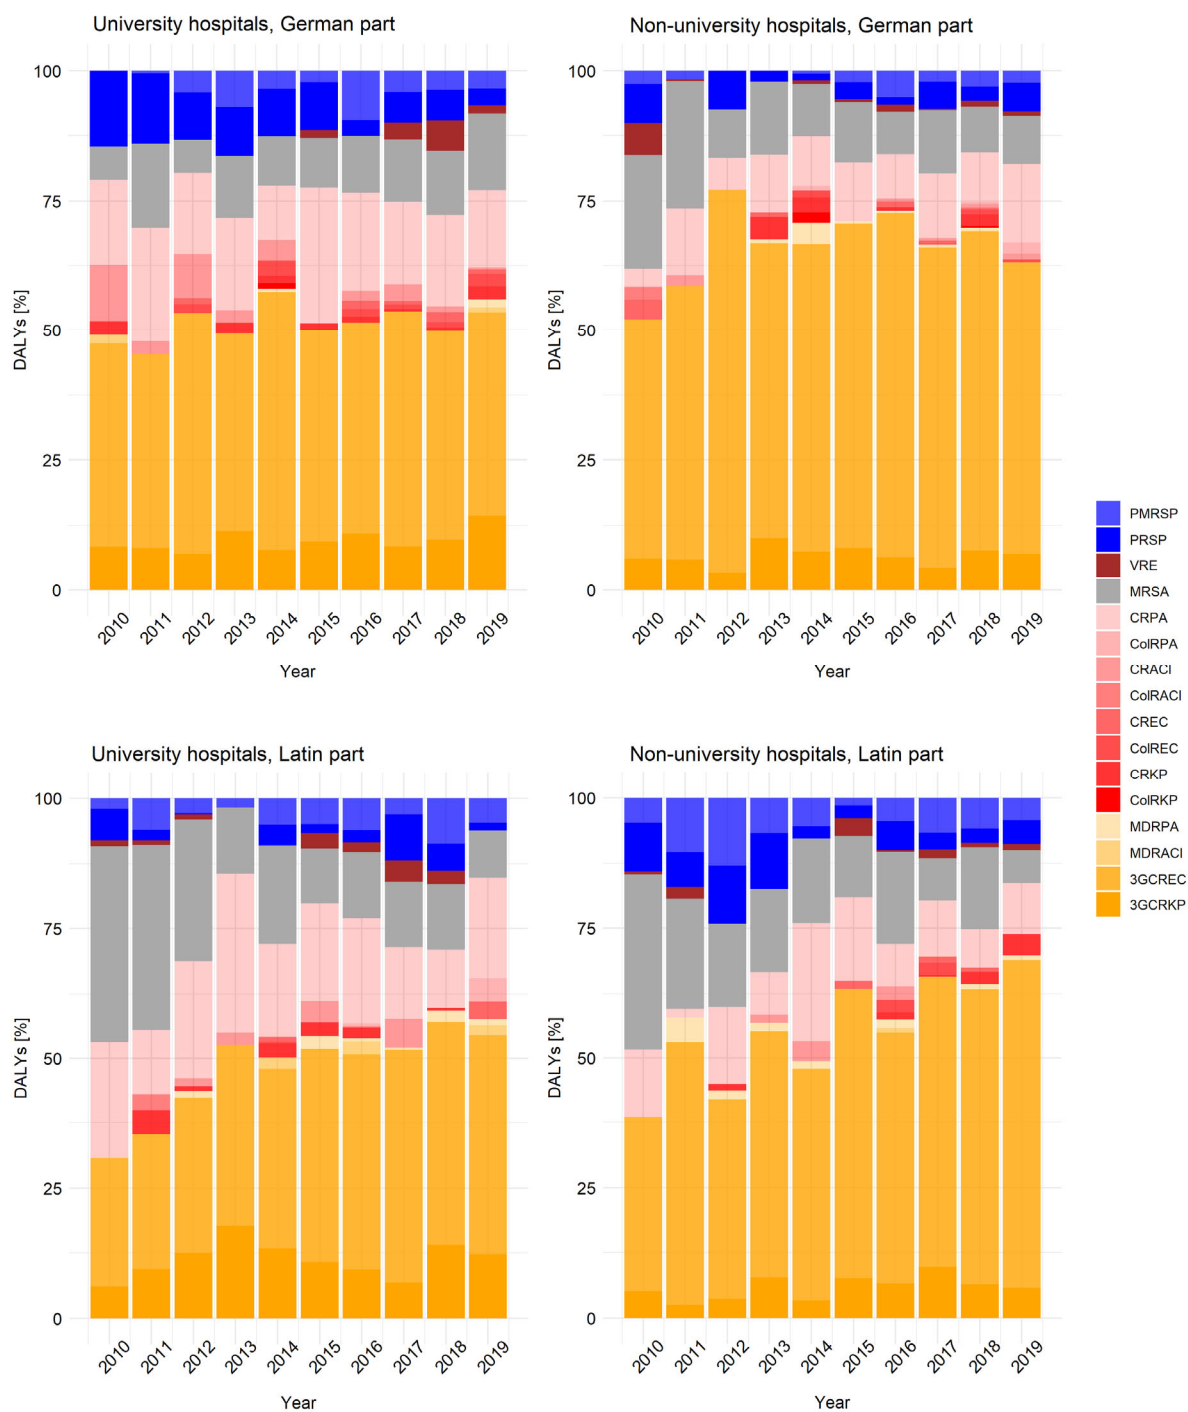

**Figure S6:** Proportions of DALYs in Switzerland (2010-2019) stratified by the linguistic region and the hospital type (university versus non-university hospitals).

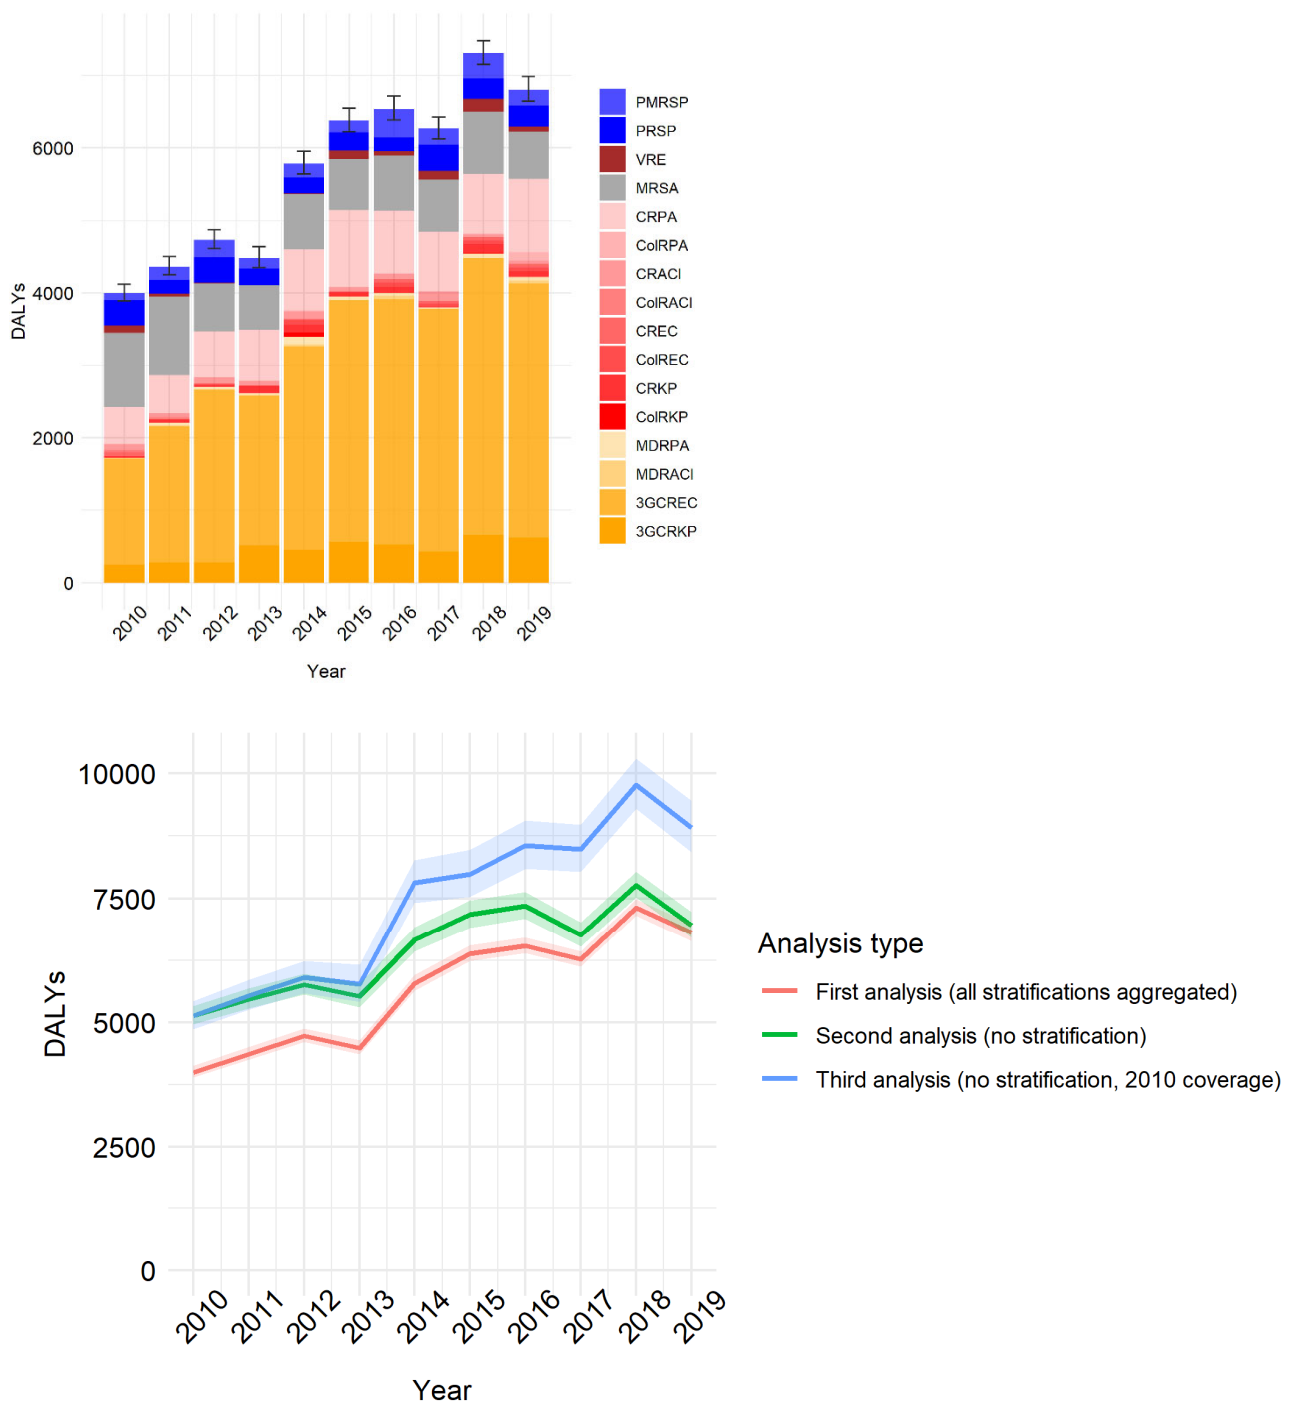

**Figure S7.** Representation of Figures 1A (upper panel) and 5 (lower panel) of the main manuscript using an approach assuming no correlation between sampled values when aggregating 95% uncertainty intervals of different distributions. The 95% uncertainty intervals are depicted by black bars and semi-transparent ribbons respectively.

**Table S1.** Yearly hospitalisation days of hospitals providing data to ANRESIS ("Hospitalisation days covered"), hospitals nationwide ("Hospitalisation days total"), and coverage rates stratified by the hospital type and the linguistic region.

| Year | University                   |                            |           |                              |                            |           | Non-university               |                            |           |                              |                            |           |
|------|------------------------------|----------------------------|-----------|------------------------------|----------------------------|-----------|------------------------------|----------------------------|-----------|------------------------------|----------------------------|-----------|
|      | German                       |                            |           | Latin                        |                            |           | German                       |                            |           | Latin                        |                            |           |
|      | Hospitalisation days covered | Hospitalisation days total | Cover-age | Hospitalisation days covered | Hospitalisation days total | Cover-age | Hospitalisation days covered | Hospitalisation days total | Cover-age | Hospitalisation days covered | Hospitalisation days total | Cover-age |
| 2010 | 814'296                      | 861'007                    | 95%       | 545'428                      | 545'428                    | 100%      | 1'742'936                    | 4'438'092                  | 39%       | 783'821                      | 1'379'383                  | 57%       |
| 2011 | 858'392                      | 858'392                    | 100%      | 543'165                      | 543'165                    | 100%      | 1'730'636                    | 4'417'646                  | 39%       | 805'652                      | 1'404'404                  | 57%       |
| 2012 | 790'435                      | 790'435                    | 100%      | 550'548                      | 550'548                    | 100%      | 1'623'631                    | 4'101'053                  | 40%       | 770'806                      | 1'335'994                  | 58%       |
| 2013 | 803'027                      | 803'027                    | 100%      | 547'470                      | 547'470                    | 100%      | 1'653'874                    | 4'076'994                  | 41%       | 757'422                      | 1'316'725                  | 58%       |
| 2014 | 773'058                      | 773'058                    | 100%      | 569'678                      | 569'678                    | 100%      | 2'257'483                    | 4'003'298                  | 56%       | 735'488                      | 1'313'951                  | 56%       |
| 2015 | 777'908                      | 777'908                    | 100%      | 589'105                      | 589'105                    | 100%      | 2'407'634                    | 4'088'192                  | 59%       | 731'216                      | 1'311'573                  | 56%       |
| 2016 | 795'887                      | 795'887                    | 100%      | 623'446                      | 623'446                    | 100%      | 2'497'406                    | 4'099'709                  | 61%       | 920'169                      | 1'306'764                  | 70%       |
| 2017 | 855'670                      | 855'670                    | 100%      | 627'373                      | 627'373                    | 100%      | 2'812'299                    | 4'005'810                  | 70%       | 900'016                      | 1'249'549                  | 72%       |
| 2018 | 853'946                      | 853'946                    | 100%      | 623'081                      | 623'081                    | 100%      | 2'994'892                    | 3'991'734                  | 75%       | 1'063'791                    | 1'254'693                  | 85%       |
| 2019 | 861'796                      | 861'796                    | 100%      | 641'387                      | 641'387                    | 100%      | 3'369'330                    | 3'916'628                  | 86%       | 1'100'109                    | 1'296'927                  | 85%       |

**Table S 2.** Annual mean and median of hospitalization days per hospital (only hospitals providing data to ANRESIS).

| Year | Hospitalisation days university hospitals |         | Hospitalisation days non-university hospitals |        |
|------|-------------------------------------------|---------|-----------------------------------------------|--------|
|      | Mean                                      | Median  | Mean                                          | Median |
| 2010 | 194'246                                   | 229'717 | 36'620                                        | 28'835 |
| 2011 | 175'195                                   | 218'735 | 37'298                                        | 29'246 |
| 2012 | 167'623                                   | 192'077 | 35'212                                        | 27'323 |
| 2013 | 168'812                                   | 199'104 | 33'962                                        | 27'413 |
| 2014 | 167'842                                   | 201'326 | 33'255                                        | 25'756 |
| 2015 | 170'877                                   | 202'361 | 33'392                                        | 24'807 |
| 2016 | 177'417                                   | 205'729 | 31'940                                        | 22'112 |
| 2017 | 185'380                                   | 235'403 | 31'460                                        | 22'768 |
| 2018 | 184'628                                   | 235'755 | 30'064                                        | 22'344 |
| 2019 | 187'898                                   | 237'423 | 29'022                                        | 20'097 |

**Table S3.** Estimated annual burden of infections with selected antibiotic-resistant bacteria of public health importance, Switzerland, 2010-2019. CoIRACI=colistin-resistant *Acinetobacter* spp. CRACI=carbapenem-resistant *Acinetobacter* spp. MDRACI=multidrug-resistant *Acinetobacter* spp. VRE=vancomycin-resistant *Enterococcus faecalis* and *Enterococcus faecium*. CoIREC=colistin-resistant *Escherichia coli*. CREC=carbapenem-resistant *E. coli*. 3GCREC=third-generation cephalosporin-resistant *E. coli*. CoIRKP=colistin-resistant *Klebsiella pneumoniae*. CRKP=carbapenem-resistant *K. pneumoniae*. 3GCRKP=third-generation cephalosporin-resistant *K. pneumoniae*. CoIRPA=colistin-resistant *Pseudomonas aeruginosa*. CRPA=carbapenem-resistant *P. aeruginosa*. MDRPA=multidrug-resistant *P. aeruginosa*. MRSA=meticillin-resistant *Staphylococcus aureus*. PRSP=penicillin-resistant *Streptococcus pneumoniae*. PMRSP=penicillin-resistant and macrolide-resistant *S. pneumoniae*. NA=not applicable (for small sample sizes (<60) no percentage increase calculated).

| Antibiotic-resistant bacteria | Infections              |                         |              | DALYs                   |                         |              | Deaths               |                      |              |
|-------------------------------|-------------------------|-------------------------|--------------|-------------------------|-------------------------|--------------|----------------------|----------------------|--------------|
|                               | 2010                    | 2019                    | Increase [%] | 2010                    | 2019                    | Increase [%] | 2010                 | 2019                 | Increase [%] |
| <b>3GCREC</b>                 | 1228 (1056-1418)        | 3794 (3303-4326)        | 209          | 1461 (1294-1634)        | 3511 (3187-3851)        | 140          | 54 (47-61)           | 169 (149-189)        | NA           |
| <b>3GCRKP</b>                 | 204 (163-250)           | 556 (484-636)           | 173          | 252 (221-287)           | 622 (572-675)           | 147          | 8 (7-9)              | 22 (21-25)           | NA           |
| <b>CoIRACI</b>                | 16 (9-25)               | 0 (0-0)                 | NA           | 34 (16-56)              | 0 (0-0)                 | NA           | 1 (0-1)              | 0 (0-0)              | NA           |
| <b>CoIREC</b>                 | 0 (0-0)                 | 17 (11-25)              | NA           | 0 (0-0)                 | 48 (28-68)              | NA           | 0 (0-0)              | 2 (1-3)              | NA           |
| <b>CoIRKP</b>                 | 0 (0-0)                 | 0 (0-0)                 | NA           | 0 (0-0)                 | 0 (0-0)                 | NA           | 0 (0-0)              | 0 (0-0)              | NA           |
| <b>CoIRPA</b>                 | 0 (0-0)                 | 79 (50-117)             | NA           | 0 (0-0)                 | 119 (69-181)            | NA           | 0 (0-0)              | 4 (2-6)              | NA           |
| <b>CRACI</b>                  | 33 (24-43)              | 28 (19-38)              | NA           | 80 (52-109)             | 40 (23-59)              | NA           | 2 (1-2)              | 1 (1-2)              | NA           |
| <b>CREC</b>                   | 13 (8-21)               | 16 (10-23)              | NA           | 53 (32-76)              | 51 (34-69)              | NA           | 1 (1-1)              | 1 (1-2)              | NA           |
| <b>CRKP</b>                   | 8 (5-11)                | 21 (14-29)              | NA           | 20 (13-27)              | 87 (57-118)             | NA           | 1 (1-1)              | 2 (1-3)              | NA           |
| <b>CRPA</b>                   | 297 (206-413)           | 756 (580-964)           | 154          | 510 (333-739)           | 1012 (735-1348)         | 98           | 14 (9-20)            | 36 (26-48)           | NA           |
| <b>MDRACI</b>                 | 6 (4-10)                | 19 (11-31)              | NA           | 12 (6-20)               | 39 (18-62)              | NA           | 0 (0-0)              | 1 (0-2)              | NA           |
| <b>MDRPA</b>                  | 0 (0-0)                 | 39 (20-71)              | NA           | 0 (0-0)                 | 45 (19-85)              | NA           | 0 (0-0)              | 2 (1-3)              | NA           |
| <b>MRSA</b>                   | 1020 (839-1226)         | 632 (519-760)           | -38          | 1022 (898-1169)         | 656 (581-742)           | -36          | 41 (36-47)           | 25 (22-29)           | NA           |
| <b>PMRSP</b>                  | 64 (55-81)              | 125 (109-150)           | 94           | 95 (79-121)             | 222 (193-265)           | 134          | 4 (3-5)              | 8 (7-9)              | NA           |
| <b>PRSP</b>                   | 121 (103-148)           | 144 (126-170)           | 19           | 352 (302-430)           | 288 (253-338)           | -18          | 7 (6-9)              | 9 (8-10)             | NA           |
| <b>VRE</b>                    | 100 (43-200)            | 116 (60-196)            | 16           | 101 (81-137)            | 66 (52-86)              | -35          | 3 (2-4)              | 3 (3-5)              | NA           |
| <b>Overall</b>                | <b>3110 (2516-3844)</b> | <b>6342 (5316-7538)</b> | <b>104</b>   | <b>3995 (3327-4805)</b> | <b>6805 (5820-7949)</b> | <b>70</b>    | <b>136 (114-161)</b> | <b>286 (243-335)</b> | <b>111</b>   |
